1

1 **TITLE**

2 Phase angle is related to physical function and quality of life in preoperative  
3 patients with lumbar spinal stenosis

4

5 Ryota Otsubo<sup>1)</sup>, Ryuki Hashida<sup>1) 2)</sup>, Kenta Murotani<sup>3)</sup>, Sohei Iwanaga<sup>1) 2)</sup>,  
6 Keisuke Hirota<sup>1)</sup>, Syunji Koya<sup>1)</sup>, Yuya Tsukada<sup>1)</sup>, Yuta Ogata<sup>1)</sup>, Kimiaki  
7 Yokosuka<sup>2)</sup>, Tatsuhiro Yoshida<sup>2)</sup>, Ichiro Nakae<sup>2)</sup>, Takuma Fudo<sup>2)</sup>, Shinji  
8 Morito<sup>2)</sup>, Takahiro Shimazaki<sup>2)</sup>, Shingo Shimogawa<sup>4)</sup>, Reika Yamaryo<sup>4)</sup>, Mai  
9 Ito<sup>4)</sup>, Kei Yamada<sup>2)</sup>, Kimiaki Sato<sup>2)</sup>, Hiroo Matsuse<sup>1) 2)</sup>, Naoto Shiba<sup>1) 2)</sup>, Koji  
10 Hiraoka<sup>2)</sup>

11

12 1 Division of Rehabilitation, Kurume University Hospital, 67 Asahi-machi, Kurume,  
13 Fukuoka, 830-0011, Japan

14 2 Department of Orthopaedics, Kurume University, 67 Asahi-machi, Kurume,  
15 Fukuoka, 830-0011, Japan

16 3 Biostatistics Center, Kurume University, 67 Asahi-machi, Kurume, Fukuoka,  
17 830-0011, Japan

18 4 Department of Nursing Kurume University Hospital, 67 Asahi-machi, Kurume,  
19 Fukuoka, 830-0011, Japan

20

21 Address for corresponding with the author: Ryuki Hashida, M.D., PhD.

22 <https://orcid.org/0000-0002-2459-9949>

23 Department of Orthopedics, Kurume University School of Medicine, Kurume,  
24 Japan

25 67 Asahi-machi, Kurume 830-0011, Japan

26 Tel: +81-942-31-7568

27 Fax: +81-942-35-0709

28 E-mail: [hashida\\_ryuuki@med.kurume-u.ac.jp](mailto:hashida_ryuuki@med.kurume-u.ac.jp)

29

30 Registry and the registration number: Hashida, Ryuki; Otsubo Ryota, 2022,  
31 "Phase angle is related to physical function and quality of life in preoperative  
32 patients with lumbar spinal stenosis", <https://doi.org/10.7910/DVN/REBPZ4>,  
33 Harvard Dataverse, V1

34

35 Running title: Phase angle is related to physical function and quality of life in  
36 patients with lumbar spinal stenosis.

37

38

39 Disclosures: Ryota Otsubo, Ryuki Hashida, Kenta Murotani, Sohei Iwanaga,  
40 Keisuke Hirota, Syunji Koya, Yuya Tsukada, Yuta Ogata, Kimiaki Yokosuka,  
41 Tatsuhiro Yoshida, Ichiro Nakae, Takuma Fudo, Shinji Morito, Takahiro  
42 Shimazaki, Shingo Shimogawa, Reika Yamaro, Mai Ito, Kei Yamada, Kimiaki  
43 Sato, Hiroo Matsuse, Naoto Shiba, Koji Hiraoka declare that they have no conflict  
44 of interest.

45

46 **Abstract**

47 **Purpose** Lumbar spinal stenosis (LSS) causes various symptoms, which can  
48 interfere with daily life and Quality of Life (QOL). Evaluating both patients'  
49 physical function and QOL and helping them to improve is the focus of  
50 rehabilitation. Phase angle (PhA) assessment has been widely used to measure  
51 body composition, and it has been reported to reflect physical function and QOL.  
52 The purpose of this study was to investigate the relationship between PhA and  
53 physical function, physical activity, and QOL in patients with LSS.

54 **Methods** PhA, handgrip strength, walking speed, timed up and go test (TUG),  
55 Life Space Assessment (LSA), Prognostic Nutritional Index (PNI), Japanese  
56 Orthopaedic Association back pain evaluation questionnaire (JOABPEQ), and  
57 EQ-5D were assessed. Multiple regression analysis was conducted to investigate  
58 the relationship of PhA to physical function, physical activity, and QOL using.

59 **Results** Statistical analysis was performed on 104 patients with LSS. The results  
60 of multiple regression analysis of PhA adjusted for age, gender, and BMI (Model  
61 1) and PhA adjusted for age, gender, BMI, and PNI (Model 2) compared with  
62 physical function and physical activity showed significant correlations  
63 respectively ( $P < 0.05$ ) in handgrip strength, walking speed, TUG, and LSA. In  
64 QOL assessment, both models showed a significant correlation ( $P < 0.05$ ) with  
65 lumbar function in JOABPEQ and a significant trend ( $P < 0.1$ ) in EQ-5D.

66 **Conclusion** PhA in LSS patients in this study was associated with physical  
67 function and QOL, and may be a useful new tool for clinical evaluation in  
68 preoperative LSS patients.

69 (241words)

70

## 71 **Introduction**

72 Lumbar spinal stenosis (LSS) is a disease caused by narrowing of the  
73 spinal canal, impedes the nerves and blood vessels traveling through the lumbar  
74 spine. LSS causes pain in the lower back, buttocks, and lower extremities, which  
75 can interfere with daily life [1]. In addition, intermittent claudication is one of the  
76 most common symptoms of LSS, severely limiting the patient's mobility. It has  
77 been reported that LSS with impaired activities of daily living may lead to  
78 psychosocial problems such as depression and isolation due to symptoms such  
79 as intermittent claudication, back pain, numbness, and muscle weakness in the  
80 lower limbs, leading to a decrease in quality of life (QOL) [2]. Improving QOL is  
81 one of the important goals of LSS treatment [3], and assessing QOL is also  
82 important in physical therapy.

83  
84 QOL is a term that originated from the World Health Organization's  
85 (WHO) 1947 Charter on Health, which defines health as not only the absence of  
86 disease, but also a state of physical, psychological, and social satisfaction. The  
87 evaluation of QOL is broadly classified into three categories: health-related QOL,  
88 non-health-related QOL and psychological QOL including wellbeing, happiness,  
89 and satisfaction with life. Of these, health-related QOL has been roughly divided  
90 into two scales: a disease-specific scale that evaluates specific symptoms of  
91 disease, and a comprehensive scale that evaluates general conditions regardless  
92 of the presence or absence of disease. The Japanese Orthopaedic Association  
93 Back Pain Evaluation Questionnaire (JOABPEQ) is a patient-administered scale  
94 that includes a lumbar spine disease-specific QOL assessment that can evaluate  
95 not only pain but also functional disability, gait dysfunction, social disadvantage,  
96 and psychological disability due to back pain [3]. The EuroQOL 5 dimensions 3-  
97 level (EQ-5D) is a scale that assesses a comprehensive health-related quality of  
98 life score that evaluates mobility, self-care, activity, pain, and depression on three  
99 levels [4].

100

101 In recent years, phase angle (PhA) assessment has been widely used to  
102 noninvasively measure body composition, and has been reported as a measure  
103 of skeletal muscle quality [5]. A high value of PhA reflects higher cellularity, cell  
104 membrane integrity and better cell function, while a low value reflects cell loss  
105 and reduced cell membrane integrity [6]. PhA has been reported to correlate with  
106 physical functions such as muscle strength, balance, and walking speed in both

107 community-dwelling elderly and cancer patients [7, 8]. In maintenance  
108 hemodialysis patients, a correlation with health-related QOL has been reported  
109 [9, 10]. Therefore, PhA reflects physical function and QOL, and is considered to  
110 be a useful tool for understanding patients' condition in clinical practice. However,  
111 although PhA is a non-invasive and simple method of measuring body  
112 composition, there have been few reports using PhA in orthopedic diseases, and  
113 its relationship with physical function and QOL has not yet been fully investigated.  
114 LSS is often associated with pain and numbness, which may make it difficult to  
115 assess physical functions such as muscle strength, balance function, and walking  
116 speed. In addition, physical function, activities of daily living, and QOL are  
117 interrelated, and PhA, which can measure them non-invasively, may be useful for  
118 indirect assessment of physical function and QOL in patients who are difficult to  
119 assess in practice.

120

121 The purpose of this study was to investigate the relationship between  
122 PhA, physical function, and QOL in patients with LSS, an orthopedic disease.

123

## 124 **Method**

### 125 **Ethics**

126 The study protocol conformed to the ethics guidelines of the Declaration  
127 of Helsinki, as reflected in prior approval given by the institutional review board  
128 of University Hospital (approval ID: 22017). This study was a retrospective study,  
129 thus we published documents of informed consent forms including the title of the  
130 study, subject, and aim on the web. Informed consent from patients was obtained  
131 using an opt-out approach.

132

### 133 **Patients**

134 This cross-sectional study was conducted on 162 patients admitted for  
135 surgery for LSS in the orthopedic ward of our hospital between May 2020 and  
136 April 2021. Data collection was conducted in May 2022, and no personally  
137 identifiable participant information was accessed after data collection. The  
138 eligibility criteria for this study were patients who were admitted for surgery for  
139 lumbar spinal canal stenosis and were at least 60 years of age. The exclusion  
140 criteria were pyogenic spondylitis, metastatic bone tumor, history of stroke,  
141 difficulty in standing due to hemiplegia, difficulty in measuring body composition,  
142 insertion of a pacemaker, and inability to answer the questionnaire. The

143 procedures for various examinations and evaluations were as follows: PhA was  
144 measured before admission, and physical function and QOL evaluations were  
145 performed before surgery.

146

### 147 **Phase angle (PhA)**

148 PhA was measured using bioelectrical impedance analysis (BIA). An  
149 Inbody 770 BIA unit (Inbody Co., Ltd., Seoul, Korea) was used for the  
150 measurements. The BIA measures body composition by passing a weak  
151 alternating current through the body and taking the impedance or the difference  
152 between each tissue. Impedance is a general term for resistance components  
153 that interfere with the current, and impedance can be divided into resistance (R)  
154 and reactance (Xc). PhA is the value of arctangent, which is Xc divided by R, and  
155 is expressed by the following equation [6].

$$156 \quad \text{Pha} = \arctangent \times Xc/R \times 180/\pi$$

157

### 158 **Life Space Assessment (LSA)**

159 The LSA is an index that assesses mobility in the spatial extent of an  
160 individual's daily life [11]. This consists of the range of living space, frequency,  
161 presence of assistive devices, and level of independence, and is a questionnaire  
162 measure that investigates the range of activities in the living space over the past  
163 month. The living space from the bedroom at home to outside the town is divided  
164 into five levels, and the total score is calculated by multiplying the score of each  
165 level by the frequency and the degree of independence. The full score is 120,  
166 and a higher score means a higher level of activity. The LSA has been used to  
167 assess mobility and daily activities of living in a variety of conditions, including  
168 community-dwelling elderly and stroke patients [12, 13].

169

### 170 **Hand-grip strength**

171 Grip strength was measured using a Smedley-type grip strength meter  
172 (Takei Kiki Kogyo, T.K.K. 5101) [14]. The subject was instructed, "After the signal,  
173 grip the grip strength meter as strongly as possible. Also, please hold the grip  
174 strength meter for 3 seconds." The right hand was measured twice, and the  
175 maximum value was adopted. Grip strength is used to measure voluntary muscle  
176 function as an indicator of muscle strength in patients with LSS [15].

177

178 **Walking speed**

179 A 10-meter walk test was conducted to calculate the walking speed. In  
180 the 10-meter walk test, two marks were placed on the floor so that the distance  
181 was 10 meters in a straight line, and the time it took from the leading foot passing  
182 the first mark to the moment it stepped on or over the second mark was measured  
183 with a stopwatch. To make sure that the subject started 1-meter before the first  
184 mark and passed the second mark by 1-meter, the subject was not told about the  
185 marks, but was shown the direction and instructed, "Walk straight ahead at your  
186 normal walking speed." [16].

187

188 **Timed Up and Go test (TUG)**

189 For the TUG, the subject was seated, and then asked "Please get up from  
190 the chair, walk as fast as you can, walk around the cone 3 meters ahead, and sit  
191 on the chair again. You may turn in either direction." The TUG was measured  
192 with a stopwatch from the time the subject's body began to move to the time they  
193 were seated on the chair again. A chair with a height of 42.0 cm and an elbow  
194 rest was used [17].

195

196 **Prognostic nutritional index (PNI)**

197 PNI is also a simple and reliable assessment of nutritional status [18].  
198 Consequently, PNI was also assessed in this study because it is predicted to be  
199 a confounder with nutrition. PNI is a prognostic score that is calculated by  
200 reflecting both the inflammatory and nutritional status of the patient. In the current  
201 study, it was calculated with the following formula using the preoperative blood  
202 test values.

203 
$$\{10 \times \text{serum albumin}(\text{g}/\text{L}) + (0.005 \times \text{total lymphocyte count}(/\mu\text{L}))\}$$

204

205 PNI has been reported to be a useful marker of malnutrition [19]. It has  
206 also been reported that low preoperative PNI is indicative of low nutritional status  
207 and is associated with postoperative complications in spinal diseases [20, 21].

208

209 **Japanese Orthopaedic Association Back Pain Evaluation Questionnaire**  
210 **(JOABPEQ)**

211 The JOABPEQ is a back pain disease-specific QOL assessment that  
212 combines the Roland-Morris Disability Questionnaire (RDQ) and the Short-Form

213 Health Survey (SF-36) with the Visual Analog Scale (VAS). The assessment  
214 consists of 25 items corresponding to five subscales: low back pain (4 items),  
215 lumbar function (6 items), walking ability (5 items), social life function (3 items),  
216 and mental health (7 items). The score for each subscale ranges from 0-100, with  
217 higher scores indicating better conditions [22].

218

### 219 **EuroQOL 5 dimensions 3-level (EQ-5D)**

220 The EQ-5D is a comprehensive quality of life scale that can be calculated  
221 by answering five questions in three levels: "degree of mobility," "personal care,"  
222 "usual activities," "pain/discomfort," and "anxiety/stress". It has been used to  
223 assess health-related quality of life in middle-aged and elderly people living at  
224 home and for various diseases, including orthopedic diseases [23, 24].

225

226

### 227 **Statistical analysis**

228 JMP version 15.0 was used for statistical analysis, and the significance  
229 level was set at 5%. As a statistical treatment, the association between PhA and  
230 each measurement item (age, gender, BMI, PNI, handgrip strength, walking  
231 speed, TUG, LSA, each sub-item of JOABPEQ, and EQ-5D) was investigated  
232 using Spearman's rank correlation coefficient. The PhA has been influenced by  
233 three main factors: age, gender, and BMI [6], and has also been reported to be a  
234 potentially useful marker of malnutrition [19]. In the present study, we focused on  
235 the relationship between PhA, physical function, and quality of life. For this  
236 purpose, we created two models, one without adjustment by PNI (Model 1) and  
237 the other with adjustment (Model 2). In each model, we investigated the  
238 relationship between PhA and physical function (grip strength, walking speed,  
239 TUG), physical activity (LSA), and QOL (JOABPEQ sub-items, EQ-5D) using  
240 multiple regression analysis with PhA as the objective variable. Grip strength,  
241 TUG, and 10-meter walk tests are easy and practical tools to assess patients'  
242 physical abilities, and these physical assessments have been used in patients  
243 with LSS in clinical settings [15, 25, 26]. Thus, we applied these items in this study.

244

### 245 **Result**

246

### 247 **Patients**

248 Of the 162 patients who met the eligibility criteria for this study, 104



249 patients were analyzed after removing the excluded cases (Figure 1). The basic  
250 attributes of the patients are shown in Table 1.

251

252 **Figure 1** Diagram of patient's inclusion and exclusion criteria in this study

253

254 **Table 1** Characteristics

| Variable                       | Median(max-min)    |
|--------------------------------|--------------------|
| Total patients                 | 104                |
| Age                            | 76(87-65)          |
| Gender(M/F)                    | 42/62              |
| BMI                            | 23.35(32.14-15.37) |
| PhA                            | 4.3(3.2-6)         |
| PNI                            | 51.95(59.85-36.2)  |
| Handgrip strength              | 22.75(45.7-8.1)    |
| Walking speed                  | 9.6(46.6-4.9)      |
| TUG                            | 0.94(2.22-0.4)     |
| LSA                            | 52.5(120-1)        |
| JOABPEQ (Low back pain)        | 43(100-0)          |
| JOABPEQ (Lumbar function)      | 58(100-0)          |
| JOABPEQ (Walking ability)      | 29(93-0)           |
| JOABPEQ (Social life function) | 43(95-3)           |
| JOABPEQ (Mental health)        | 45(89-0)           |
| EQ-5D                          | 0.596(1-0.28)      |

255 Abbreviations: PhA, phase angle; BMI, body mass index; PNI, prognostic  
256 nutritional index; TUG, timed up and go test; LSA, life space assessment;  
257 JOABPEQ, Japanese Orthopaedic Association back pain evaluation  
258 questionnaire; EQ-5D, EuroQOL 5 dimensions 3-level

259

### 260 **Correlation between PhA and each measurement item**

261 The results of Spearman's rank correlation coefficients between PhA and  
262 each measurement item are shown in Table 2. PhA showed a positive and  
263 negative correlation with the following items. PhA was positively correlated with  
264 PNI, handgrip strength, walking speed, LSA. PhA was negatively correlated with  
265 age and TUG. PhA showed a trend with BMI.

266 PhA and QOL assessment (EQ-5D and JOABPEQ items) showed a  
267 positive correlation in Lumbar function, social life function, and mental health,

268 which are sub-items of JOABPEQ, and also a positive correlation in EQ-5D.

269

270 **Table 2** Spearman's rank correlation coefficient (PhA vs each measurement  
271 item)

| Variable    | vs Variable                    | $\rho$ | P-value |
|-------------|--------------------------------|--------|---------|
| Phase Angle | Age                            | -0.443 | <.0001* |
|             | BMI                            | 0.182  | 0.0646† |
|             | PNI                            | 0.193  | 0.0499* |
|             | Handgrip strength              | 0.561  | <.0001* |
|             | Walking speed                  | 0.476  | <.0001* |
|             | TUG                            | -0.498 | <.0001* |
|             | LSA                            | 0.475  | <.0001* |
|             | JOABPEQ (Low back pain)        | -0.003 | 0.9720  |
|             | JOABPEQ (Lumbar function)      | 0.299  | 0.0021* |
|             | JOABPEQ (Walking ability)      | 0.108  | 0.2764  |
|             | JOABPEQ (Social life function) | 0.233  | 0.0175* |
|             | JOABPEQ (Mental health)        | 0.277  | 0.0044* |
|             | EQ-5D                          | 0.262  | 0.0071* |

272 Abbreviations: PhA, phase angle; BMI, body mass index; PNI, prognostic  
273 nutritional index; TUG, timed up and go test; LSA, life space assessment;  
274 JOABPEQ, Japanese Orthopaedic Association back pain evaluation  
275 questionnaire; EQ-5D, EuroQOL 5 dimensions 3-level

276 ※P-value<0.1†、 P-value<0.05\*

277

278 PhA was negatively correlated with age and showed a trend with BMI;  
279 PhA was positively correlated with LSA, handgrip strength, and walking speed in  
280 physical activity and physical function assessment, and negatively correlated with  
281 TUG test. PhA and PNI showed a positive correlation. PhA and QOL assessment  
282 (EQ-5D and JOABPEQ items) showed a positive correlation in Lumbar function,  
283 social life function, and mental health, which are sub-items of JOABPEQ, and  
284 also a positive correlation in EQ-5D.

285

286 **Multiple regression analysis of confounding-adjusted PhA, physical  
287 function, and quality of life**

288 The results of multiple regression analysis between both PhA adjusted

289 for age, gender, and BMI (Model 1) and PhA adjusted for age, gender, BMI, and  
290 PNI (Model 2) and physical function and physical activity are shown in Table 3.  
291 Moreover, the results of multiple regression analysis between both PhA and QOL  
292 assessment adjusted by Model 1, 2 are shown in Table 4. In the evaluation of  
293 physical function and physical activity, significant correlations were found for all  
294 of the handgrip strength, walking speed, TUG, and LSA measured in this study,  
295 and in QOL, significant correlations were found with the lumbar function of  
296 JOABPEQ in both Model 1 and Model 2, and a significant trend was found in EQ-  
297 5D.

298 **Table 3** Multiple regression analysis (PhA vs Physical activity and Physical function)

|                   | Outcome           | Model | Estimated value | 95%CI           | P-value |
|-------------------|-------------------|-------|-----------------|-----------------|---------|
| Physical activity | LSA               | 1     | 19.777          | 8.444 – 31.110  | 0.0008* |
|                   |                   | 2     | 21.063          | 9.581 – 32.544  | 0.0004* |
| Physical function | Handgrip strength | 1     | 3.578           | 1.126 – 6.031   | 0.0047* |
|                   |                   | 2     | 3.447           | 0.947 – 5.947   | 0.0074* |
|                   | Walking speed     | 1     | 0.293           | 0.145 – 0.440   | 0.0002* |
|                   |                   | 2     | 0.304           | 0.154 – 0.454   | 0.0001* |
|                   | TUG               | 1     | -5.460          | -8.665 – -2.254 | 0.0010* |
|                   |                   | 2     | -5.353          | -8.624 – -2.082 | 0.0016* |

299 Abbreviations: PhA, phase angle; CI, confidence interval; LSA, life space assessment; TUG, timed up and go test

300 ※Model 1: Adjusted for age, gender, and BMI

301 ※Model 2: Adjusted for age, gender, BMI, and PNI

302 ※P-value&lt;0.1†,P-value&lt;0.05\*

303

304

305 **Table 4** Multiple regression analysis (PhA vs QOL)

|                      | Outcome                        | Model | Estimated value | 95%CI            | P-value |
|----------------------|--------------------------------|-------|-----------------|------------------|---------|
| Disease-specific QOL | JOABPEQ (Low back pain)        | 1     | 0.080           | -15.479 – 15.638 | 0.9919  |
|                      |                                | 2     | 1.100           | -14.748 – 16.947 | 0.8908  |
|                      | JOABPEQ (Lumbar function)      | 1     | 16.924          | 4.641 – 29.207   | 0.0074* |
|                      |                                | 2     | 16.169          | 3.654 – 28.684   | 0.0119* |
|                      | JOABPEQ (Walking ability)      | 1     | 4.401           | -6.642 – 15.444  | 0.4310  |
|                      |                                | 2     | 5.924           | -5.220 – 17.069  | 0.2941  |
|                      | JOABPEQ (Social life function) | 1     | 5.923           | -2.397 – 14.242  | 0.1609  |
|                      |                                | 2     | 7.061           | -1.337 – 15.459  | 0.0984† |
|                      | JOABPEQ (Mental health)        | 1     | 6.388           | -1.113 – 13.889  | 0.0942† |
|                      |                                | 2     | 5.884           | -1.755 – 13.524  | 0.1296  |
| Comprehensive QOL    | EQ-5D                          | 1     | 0.044           | -0.004 – 0.093   | 0.0737† |
|                      |                                | 2     | 0.043           | -0.006 – 0.092   | 0.0897† |

306 Abbreviations: PhA, phase angle; QOL, quality of life; CI, confidence interval; JOABPEQ, Japanese Orthopaedic Association  
 307 back pain evaluation questionnaire; EQ-5D, EuroQOL 5 dimensions 3-level

308 ※Model 1: Adjusted for age, gender, and BMI

309 ※Model 2: Adjusted for age, gender, BMI, and PNI

310 ※P-value<0.1†,P-value<0.05

311 **Discussion**

312 In this study, we investigated the relationship between PhA and physical  
313 function, physical activity, and QOL in LSS patients admitted for surgery. A  
314 significant correlation was found between PhA and physical function and physical  
315 activity, and PhA was correlated with the sub-items of JOABPEQ, a disease-  
316 specific QOL assessment, and EQ-5D, a comprehensive QOL assessment.  
317 Furthermore, in multiple regression analysis, both Model 1 and Model 2 showed  
318 a correlation with lumbar function, a sub-item of the JOABPEQ. PhA may be  
319 considered a useful tool for clinical and perioperative evaluation because it  
320 reflects not only physical function but also QOL (Figure2).

321

322 **Figure 2** Graphical abstract

323 Summary of this study. The phase angle using bioelectrical impedance  
324 analysis was associated with quality of life, physical function, and physical  
325 activity in patients with lumbar spinal stenosis.

326

327 **The relationship between PhA, physical function, and physical activity**

328 In the present study, significant positive correlations were found between  
329 PhA of LSS patients and handgrip strength and walking speed, and significant  
330 negative correlations were found with the TUG test. Yamada et al. reported that  
331 PhA was significantly correlated with lower limb muscle strength in community-  
332 dwelling elderly people [27]. Tanaka et al. in their study of the locomotive  
333 syndrome (LS) and PhA in community-dwelling elderly, found that PhA was  
334 significantly correlated with the TUG test, and furthermore, PhA was an  
335 independent factor for LS [28]. In the present study conducted on patients with  
336 LSS as well as in previous studies on other diseases, PhA was significantly higher  
337 in patients with higher physical function.

338

339 Furthermore, in the present study, a significant positive correlation was  
340 also found between LSA and PhA, which indicates physical activity. High physical  
341 activity is associated with high physical function, and a correlation between  
342 physical activity and PhA has been reported in other studies [18]. However, the  
343 mechanisms of physical activity, physical function, and PhA are unknown. Based  
344 on the principles of PhA measurement, it is likely that the reason for the results  
345 of the present study is that the decrease in the amount of fat, which has a high  
346 electrical resistance, due to physical activity, decreases the resistance, and the  
increase in the size and mass of cells and the structural integrity of cell

347 membranes increases the reactance ( $X_c$ ), which in turn results in a higher PhA  
348 [6].

349

### 350 **About PhA and JOABPEQ**

351 PhA was correlated with lumbar function on the JOABPEQ in both Model  
352 1 and Model 2. The items of the JOABPEQ questioners for lumbar function  
353 included the following. "I sometimes ask for help when I do something because  
354 of my back pain," "I try not to bend my back or kneel because of my back pain,"  
355 "I have difficulty getting up from a chair because of my back pain," "I have difficulty  
356 turning over because of my back pain," "I have difficulty putting on socks or  
357 stockings because of my back pain" and "Do you find it difficult to bend forward,  
358 kneel, or bend over because of your physical condition?". These questions are  
359 related to the flexion, extension, and rotation of the trunk. For preoperative LSS  
360 patients with low back pain, trunk flexion, extension, and rotation movements  
361 should not be assessed because they are likely to induce pain. Therefore, PhA  
362 may be one of the indicators to evaluate lumbar function in patients with LSS  
363 because it can estimate lumbar function without actual movements.

364

### 365 **About PhA and Quality of Life**

366 In the present study, PhA were significant correlations found between  
367 both Model 1 and Model 2 and the lumbar function sub-items of the JOABPEQ,  
368 a disease-specific QOL scale, as well as a trend was found in the EQ-5D, a  
369 comprehensive QOL scale. Machado et al. demonstrated that PhA is associated  
370 with not only physical function but also QOL in patients with idiopathic pulmonary  
371 fibrosis [29]. Azar et al. reported in their study of dialysis patients that a clinically  
372 useful predictive tool because PhA reflects also physical function and QOL [10].  
373 This is the first study to investigate the relationship between PhA and quality of  
374 life in LSS, with results similar to other previous studies. The JOABPEQ is a  
375 lumbar spine disease-specific quality of life measure and is a highly responsive  
376 outcome measure for assessing changes over time in patients with low back pain  
377 [22]. The EQ-5D, on the other hand, is a widely used comprehensive QOL  
378 assessment [30]. The study found that both disease-specific and comprehensive  
379 QOL was associated with PhA, suggesting that PhA and QOL may be related in  
380 patients with LSS. Few studies have investigated both QOL measures, and the  
381 results of this study seem to confirm the above findings. Moreover, as mentioned  
382 earlier, PhA also reflected the physical function (lumbar spine function) and QOL

383 of LSS patients in this study. Evaluating both physical function and QOL of  
384 patients and helping them to improve is the focus of rehabilitation [31]. Therefore,  
385 PhA may be one useful tool in physical therapy in patients with LSS.

386

### 387 **Limitation**

388 There are several limitations of this study that should be considered.  
389 First, it is a cross-sectional study, and the causal relationship is unclear because  
390 the broader relationship between disease and factors is not known due to the  
391 design. In addition, this was a single-center study with a small number of cases  
392 and no direct assessment of lumbar function. In this study, only preoperative  
393 patients were studied, and future studies of patients who are not suitable for  
394 surgery and postoperative patients should be examined. Moreover, we  
395 demonstrated that PhA is associated with QOL and physical function in patients  
396 with LSS in this study, however, we didn't compare it with healthy subjects or  
397 other diseases. The extent of spinal canal narrowing correlates with the limitation  
398 of LSS-typical claudication. We didn't investigate the radiological extent of spinal  
399 canal narrowing. We need to investigate the radiological extent of spinal canal  
400 narrowing in a future study.

401

### 402 **Conclusion**

403 PhA was found to be associated with physical function and QOL in LSS  
404 patients. PhA may be a useful new tool for clinical assessment in preoperative  
405 LSS patients.



406 **Reference**

- 407 1. Takenaka H, Sugiura H, Kamiya M, Nishihama K, Ito A, Suzuki J, et al.  
408 Predictors of walking ability after surgery for lumbar spinal canal stenosis: a  
409 prospective study. *Spine J.* 2019;19(11):1824-31. Epub 2019/07/16. doi:  
410 10.1016/j.spinee.2019.07.002. PubMed PMID: 31302266.
- 411 2. Sobottke R, Herren C, Siewe J, Mannion AF, Roder C, Aghayev E.  
412 Predictors of improvement in quality of life and pain relief in lumbar spinal  
413 stenosis relative to patient age: a study based on the Spine Tango registry. *Eur*  
414 *Spine J.* 2017;26(2):462-72. Epub 2015/07/04. doi: 10.1007/s00586-015-4078-  
415 8. PubMed PMID: 26138216.
- 416 3. Kobayashi H, Sekiguchi M, Yonemoto K, Kakuma T, Tominaga R, Kato  
417 K, et al. Reference values of the Japanese Orthopaedic Association Back Pain  
418 Evaluation Questionnaire in patients with lumbar spinal stenosis and  
419 characteristics of deterioration of QOL: Lumbar Spinal Stenosis Diagnosis  
420 Support Tool: DISTO project. *J Orthop Sci.* 2019;24(4):584-9. Epub 2019/01/09.  
421 doi: 10.1016/j.jos.2018.11.022. PubMed PMID: 30616940.
- 422 4. Kim K, Youn Y, Lee SH, Choi JC, Jung JE, Kim J, et al. The  
423 effectiveness and safety of nonsurgical integrative interventions for symptomatic  
424 lumbar spinal spondylolisthesis: A randomized controlled multinational,  
425 multicenter trial protocol. *Medicine (Baltimore).* 2018;97(19):e0667. Epub  
426 2018/05/10. doi: 10.1097/MD.00000000000010667. PubMed PMID: 29742708;  
427 PubMed Central PMCID: PMC5959416.
- 428 5. Abe T, Yoshimura Y, Imai R, Yoneoka Y, Tsubaki A, Sato Y. Impact of  
429 Phase Angle on Physical Function in Patients with Acute Stroke. *J Stroke*  
430 *Cerebrovasc Dis.* 2021;30(9):105941. Epub 2021/07/04. doi:  
431 10.1016/j.jstrokecerebrovasdis.2021.105941. PubMed PMID: 34217068.
- 432 6. Norman K, Stobaus N, Pirlich M, Bosy-Westphal A. Bioelectrical phase  
433 angle and impedance vector analysis--clinical relevance and applicability of  
434 impedance parameters. *Clin Nutr.* 2012;31(6):854-61. Epub 2012/06/16. doi:  
435 10.1016/j.clnu.2012.05.008. PubMed PMID: 22698802.
- 436 7. Matias CN, Nunes CL, Francisco S, Tomeleri CM, Cyrino ES, Sardinha  
437 LB, et al. Phase angle predicts physical function in older adults. *Arch Gerontol*  
438 *Geriatr.* 2020;90:104151. Epub 2020/06/22. doi:  
439 10.1016/j.archger.2020.104151. PubMed PMID: 32563736.
- 440 8. Matias CN, Cavaco-Silva J, Reis M, Campa F, Toselli S, Sardinha L, et  
441 al. Phase Angle as a Marker of Muscular Strength in Breast Cancer Survivors.

- 442 Int J Environ Res Public Health. 2020;17(12). Epub 2020/06/25. doi:  
443 10.3390/ijerph17124452. PubMed PMID: 32575835; PubMed Central PMCID:  
444 PMCPMC7345005.
- 445 9. Kang SH, Do JY, Kim JC. Impedance-derived phase angle is  
446 associated with muscle mass, strength, quality of life, and clinical outcomes in  
447 maintenance hemodialysis patients. PLoS One. 2022;17(1):e0261070. Epub  
448 2022/01/13. doi: 10.1371/journal.pone.0261070. PubMed PMID: 35020730;  
449 PubMed Central PMCID: PMCPMC8754345.
- 450 10. Beberashvili I, Azar A, Sinuani I, Shapiro G, Feldman L, Stav K, et al.  
451 Bioimpedance phase angle predicts muscle function, quality of life and clinical  
452 outcome in maintenance hemodialysis patients. Eur J Clin Nutr.  
453 2014;68(6):683-9. Epub 2014/04/17. doi: 10.1038/ejcn.2014.67. PubMed PMID:  
454 24736681.
- 455 11. Peel C, Sawyer Baker P, Roth DL, Brown CJ, Brodner EV, Allman RM.  
456 Assessing mobility in older adults: the UAB Study of Aging Life-Space  
457 Assessment. Phys Ther. 2005;85(10):1008-119. Epub 2005/09/27. PubMed  
458 PMID: 16180950.
- 459 12. Yang YN, Kim BR, Uhm KE, Kim SJ, Lee S, Oh-Park M, et al. Life  
460 Space Assessment in Stroke Patients. Ann Rehabil Med. 2017;41(5):761-8.  
461 Epub 2017/12/05. doi: 10.5535/arm.2017.41.5.761. PubMed PMID: 29201814;  
462 PubMed Central PMCID: PMCPMC5698662.
- 463 13. Simoes M, Garcia IF, Costa LDC, Lunardi AC. Life-Space Assessment  
464 questionnaire: Novel measurement properties for Brazilian community-dwelling  
465 older adults. Geriatr Gerontol Int. 2018;18(5):783-9. Epub 2018/01/27. doi:  
466 10.1111/ggi.13263. PubMed PMID: 29372585.
- 467 14. Makizako H, Kubozono T, Kiyama R, Takenaka T, Kuwahata S, Tabira  
468 T, et al. Associations of social frailty with loss of muscle mass and muscle  
469 weakness among community-dwelling older adults. Geriatr Gerontol Int.  
470 2019;19(1):76-80. Epub 2018/12/24. doi: 10.1111/ggi.13571. PubMed PMID:  
471 30575241.
- 472 15. Kwon JW, Lee BH, Lee SB, Sung S, Lee CU, Yang JH, et al. Hand grip  
473 strength can predict clinical outcomes and risk of falls after decompression and  
474 instrumented posterolateral fusion for lumbar spinal stenosis. Spine J.  
475 2020;20(12):1960-7. Epub 2020/07/06. doi: 10.1016/j.spinee.2020.06.022.  
476 PubMed PMID: 32622937.
- 477 16. Peters DM, Fritz SL, Krotish DE. Assessing the reliability and validity of

- 478 a shorter walk test compared with the 10-Meter Walk Test for measurements of  
479 gait speed in healthy, older adults. *J Geriatr Phys Ther.* 2013;36(1):24-30. Epub  
480 2012/03/15. doi: 10.1519/JPT.0b013e318248e20d. PubMed PMID: 22415358.
- 481 17. Schoene D, Wu SM, Mikolaizak AS, Menant JC, Smith ST, Delbaere K,  
482 et al. Discriminative ability and predictive validity of the timed up and go test in  
483 identifying older people who fall: systematic review and meta-analysis. *J Am*  
484 *Geriatr Soc.* 2013;61(2):202-8. Epub 2013/01/29. doi: 10.1111/jgs.12106.  
485 PubMed PMID: 23350947.
- 486 18. Di Vincenzo O, Marra M, Di Gregorio A, Pasanisi F, Scalfi L.  
487 Bioelectrical impedance analysis (BIA) -derived phase angle in sarcopenia: A  
488 systematic review. *Clin Nutr.* 2021;40(5):3052-61. Epub 2020/11/14. doi:  
489 10.1016/j.clnu.2020.10.048. PubMed PMID: 33183880.
- 490 19. Hirose S, Nakajima T, Nozawa N, Katayanagi S, Ishizaka H, Mizushima  
491 Y, et al. Phase Angle as an Indicator of Sarcopenia, Malnutrition, and Cachexia  
492 in Inpatients with Cardiovascular Diseases. *J Clin Med.* 2020;9(8). Epub  
493 2020/08/13. doi: 10.3390/jcm9082554. PubMed PMID: 32781732; PubMed  
494 Central PMCID: PMCPMC7463846.
- 495 20. Ushirozako H, Hasegawa T, Yamato Y, Yoshida G, Yasuda T, Banno T,  
496 et al. Does preoperative prognostic nutrition index predict surgical site infection  
497 after spine surgery? *Eur Spine J.* 2021;30(6):1765-73. Epub 2020/10/11. doi:  
498 10.1007/s00586-020-06622-1. PubMed PMID: 33037485.
- 499 21. Acarbas A. A Novel Prognostic Marker in Patients Undergoing Spinal  
500 Surgery: Prognostic Nutritional Index. *J Neurol Surg A Cent Eur Neurosurg.*  
501 2019;80(6):470-4. Epub 2019/08/30. doi: 10.1055/s-0039-1693031. PubMed  
502 PMID: 31466102.
- 503 22. Azimi P, Yazdanian T, Benzel EC. Determination of minimally clinically  
504 important differences for JOABPEQ measure after discectomy in patients with  
505 lumbar disc herniation. *J Spine Surg.* 2018;4(1):102-8. Epub 2018/05/08. doi:  
506 10.21037/jss.2018.03.11. PubMed PMID: 29732429; PubMed Central PMCID:  
507 PMCPMC5911764.
- 508 23. Barzilai O, Versteeg AL, Sahgal A, Rhines LD, Bilsky MH, Sciubba DM,  
509 et al. Survival, local control, and health-related quality of life in patients with  
510 oligometastatic and polymetastatic spinal tumors: A multicenter, international  
511 study. *Cancer.* 2019;125(5):770-8. Epub 2018/11/30. doi: 10.1002/cncr.31870.  
512 PubMed PMID: 30489634; PubMed Central PMCID: PMCPMC8020734.
- 513 24. van der Vliet QMJ, Ochen Y, McTague MF, Weaver MJ, Hietbrink F,

- 514 Houwert RM, et al. Long-term outcomes after operative treatment for tibial pilon  
515 fractures. *OTA Int.* 2019;2(4):e043. Epub 2019/11/22. doi:  
516 10.1097/OI9.000000000000043. PubMed PMID: 33937671; PubMed Central  
517 PMCID: PMCPMC7997126.
- 518 25. Stienen MN, Maldaner N, Joswig H, Corniola MV, Bellut D, Prommel P,  
519 et al. Objective functional assessment using the "Timed Up and Go" test in  
520 patients with lumbar spinal stenosis. *Neurosurg Focus.* 2019;46(5):E4. Epub  
521 2019/05/03. doi: 10.3171/2019.2.FOCUS18618. PubMed PMID: 31042663.
- 522 26. Inoue H, Watanabe H, Okami H, Shiraishi Y, Kimura A, Takeshita K.  
523 Handgrip strength correlates with walking in lumbar spinal stenosis. *Eur Spine*  
524 *J.* 2020;29(9):2198-204. Epub 2020/07/12. doi: 10.1007/s00586-020-06525-1.  
525 PubMed PMID: 32651633.
- 526 27. Yamada Y, Buehring B, Krueger D, Anderson RM, Schoeller DA,  
527 Binkley N. Electrical Properties Assessed by Bioelectrical Impedance  
528 Spectroscopy as Biomarkers of Age-related Loss of Skeletal Muscle Quantity  
529 and Quality. *J Gerontol A Biol Sci Med Sci.* 2017;72(9):1180-6. Epub  
530 2017/08/18. doi: 10.1093/gerona/glw225. PubMed PMID: 28814064; PubMed  
531 Central PMCID: PMCPMC5861891.
- 532 28. Tanaka S, Ando K, Kobayashi K, Seki T, Hamada T, Machino M, et al.  
533 The decreasing phase angles of the entire body and trunk during bioelectrical  
534 impedance analysis are related to locomotive syndrome. *J Orthop Sci.*  
535 2019;24(4):720-4. Epub 2019/01/12. doi: 10.1016/j.jos.2018.12.016. PubMed  
536 PMID: 30630769.
- 537 29. Machado FVC, Bloem AEM, Schneeberger T, Jarosch I, Gloeckl R,  
538 Winterkamp S, et al. Relationship between body composition, exercise capacity  
539 and health-related quality of life in idiopathic pulmonary fibrosis. *BMJ Open*  
540 *Respir Res.* 2021;8(1). Epub 2021/10/30. doi: 10.1136/bmjresp-2021-001039.  
541 PubMed PMID: 34711642; PubMed Central PMCID: PMCPMC8557280.
- 542 30. Thompson AJ, Turner AJ. A Comparison of the EQ-5D-3L and EQ-5D-  
543 5L. *Pharmacoeconomics.* 2020;38(6):575-91. Epub 2020/03/18. doi:  
544 10.1007/s40273-020-00893-8. PubMed PMID: 32180162.
- 545 31. Rosa Silva JP, Santiago Junior JB, Dos Santos EL, de Carvalho FO, de  
546 Franca Costa IMP, Mendonca DMF. Quality of life and functional independence  
547 in amyotrophic lateral sclerosis: A systematic review. *Neurosci Biobehav Rev.*  
548 2020;111:1-11. Epub 2020/01/10. doi: 10.1016/j.neubiorev.2019.12.032.  
549 PubMed PMID: 31917162.

21

550

**Figure 1** Diagram of patient's inclusion and exclusion criteria in this study

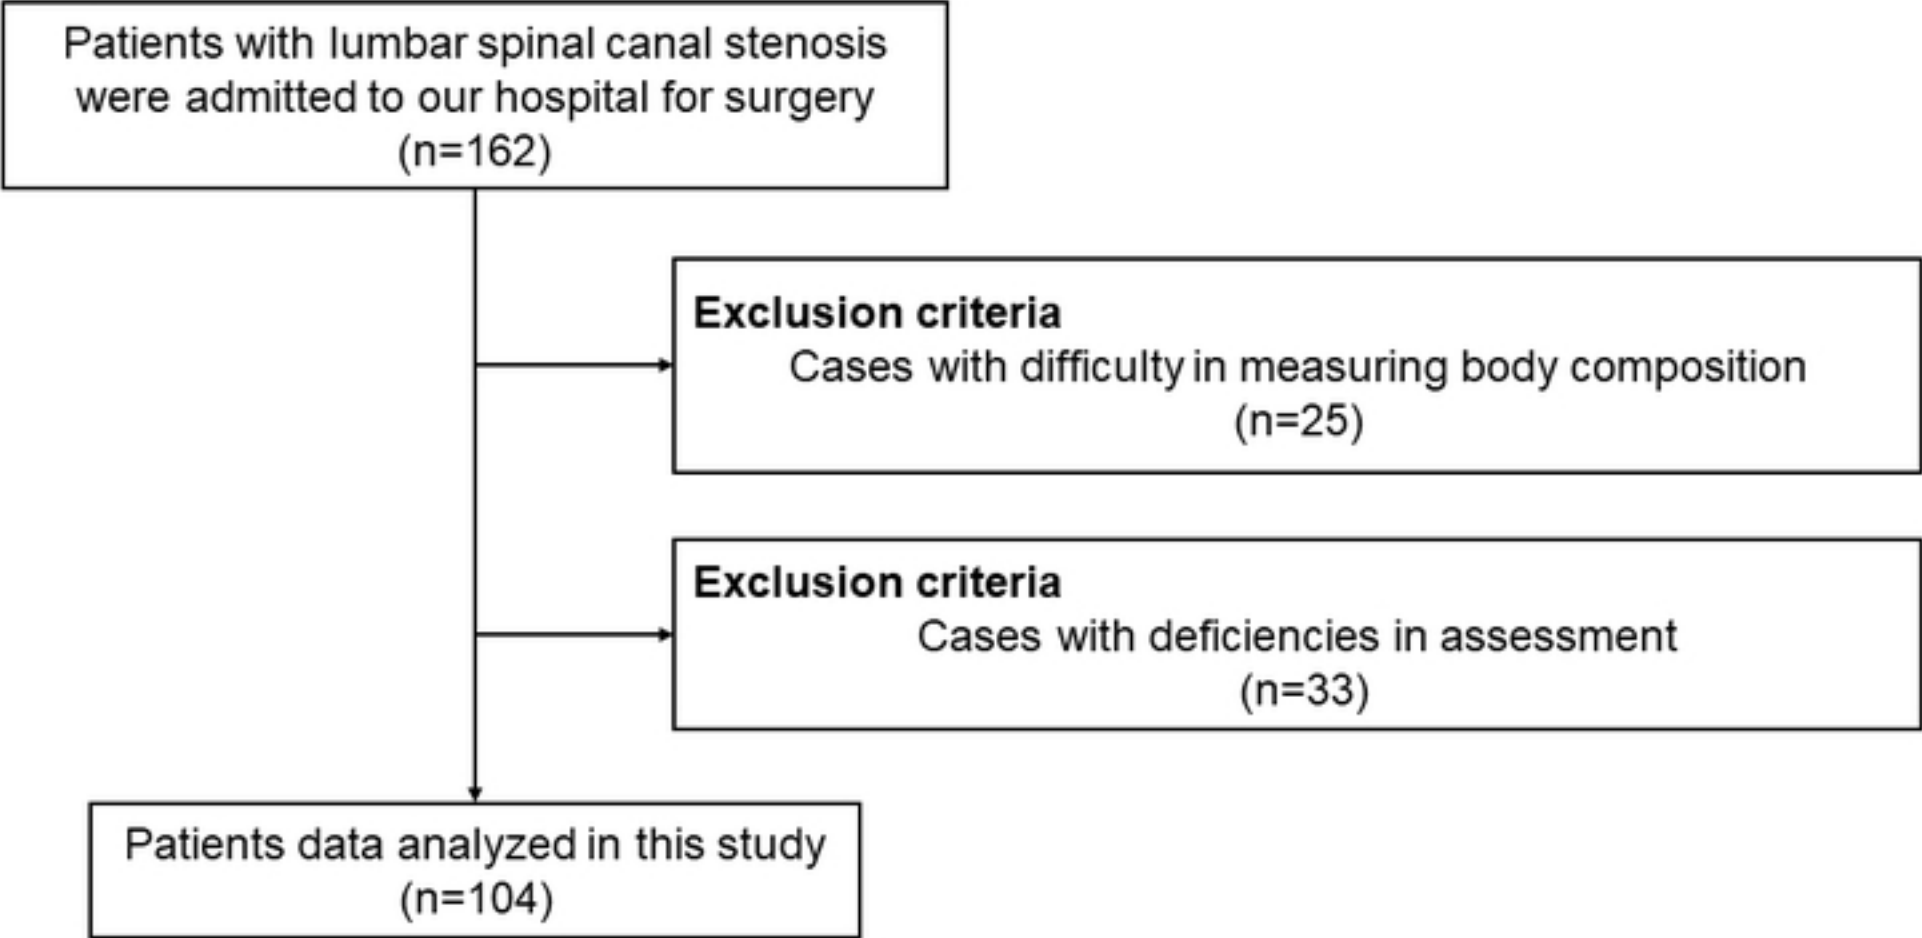

Figure

Figure 2 graphical abstract

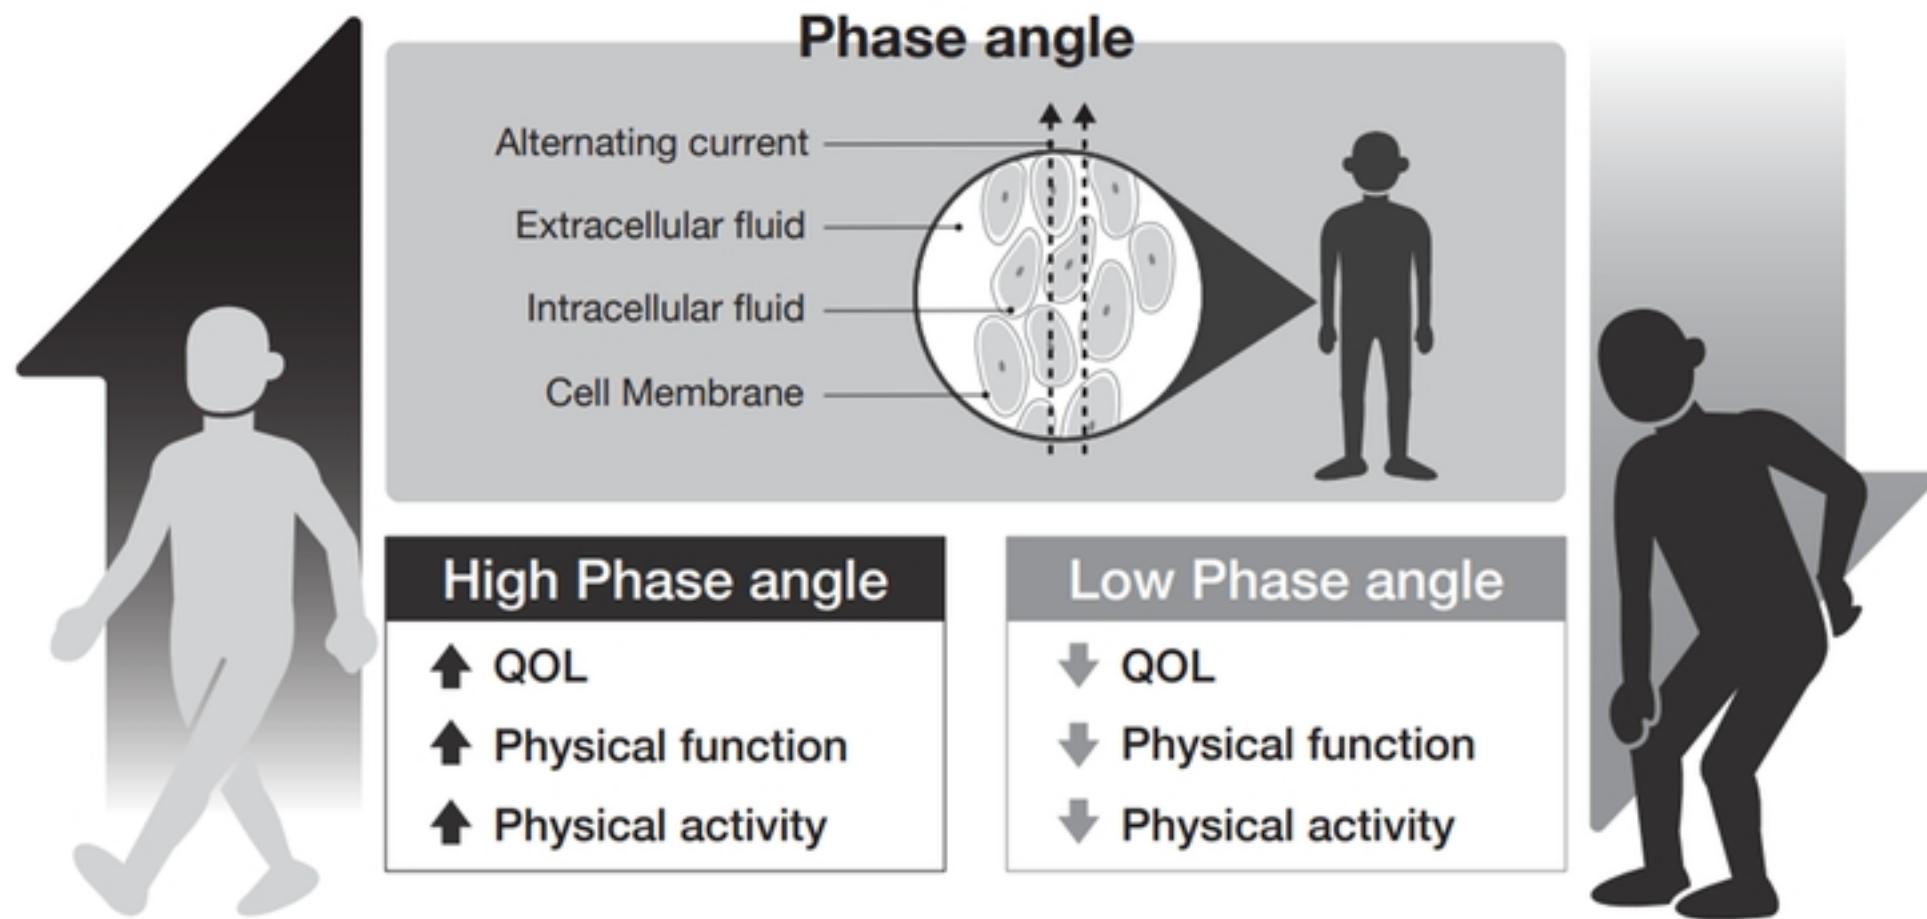

Figure
